# Supplementary material for: Epithelial Monolayers Coalesce on a Viscoelastic Substrate through Redistribution of Vinculin
Source: PubMed Central journal article supplement — Biophys J. 2017 Aug 24;113(7):1585–98. doi: 10.1016/j.bpj.2017.07.027 (PMC5627150; doi:10.1016/j.bpj.2017.07.027), 2017-08-24

**Biophysical Journal, Volume 113**

**Supplemental Information**

**Epithelial Monolayers Coalesce on a Viscoelastic Substrate through  
Redistribution of Vinculin**

**Ji Yun Zheng, Siew Ping Han, Yi-Jen Chiu, Ai Kia Yip, Nicolas Boichat, Shi Wen Zhu, Jun  
Zhong, and Paul Matsudaira**

## Supplementary legends

### Movie S1

Coalescence in CL-S1 monolayer on VE PDMS, overlaid with mask of cell-free area (green). Images were acquired by time-lapse phase microscopy with frames taken every 15 minutes.

### Movie S2

Movie of Coalescence in CL-S1 monolayer incubated with 0.5  $\mu$ M calcein, a marker for live cells, on VE PDMS. Images were acquired by time-lapse phase and epifluorescence microscopy with frames taken every 15 minutes.

### Movie S3

CL-S1 cells on elastic PDMS. Images were acquired by time-lapse phase microscopy with frames taken every 15 minutes.

### Figure S1

(A)  $G'$  (elastic moduli) and  $G''$  (viscous moduli) values for PDMS at different crosslinker ratios. In the elastic (E) and soft elastic (SE) regimes, elastic properties predominate, whereas in the viscoelastic (VE) regime, elastic and viscous properties are of similar proportions. (B) Confocal projections of fibronectin-coated PDMS substrata immunostained for fibronectin. (C) Z-profile of fluorescence intensity of images in (B). (D) Confocal projections of HeLa cells, fixed, and immunostained 4h post-plating. (E) VE and E PDMS substrata were prepared by either spin-coating  $\sim$ 200ul PDMS at 6000g for 10s (regular, reg); or  $\sim$ 50ul PDMS at 8000 G for 30s (thin). (n=3). (F) Confocal images of CL-S1 cells plated on regular and thin VE PDMS substrata, fixed and immunostained 4h post-plating.

### Movie S4

CL-S1 cells on viscous PDMS. Images were acquired by time-lapse phase microscopy with frames taken every 15 minutes.

### Movie S5

MDCK monolayer and CL-S1 monolayer plated on VE PDMS substrata coated with rhodamine-fibronectin. Images were acquired by time-lapse phase and epifluorescence microscopy with frames taken every 30 minutes.

### Movie S6

CL-S1 monolayers plated on E, SE and VE PDMS substrata coated with fibronectin-Alexa488. Images were acquired by time-lapse phase and epifluorescence microscopy with frames taken every 15 minutes.

### Movie S7

PIV analysis of CL-S1 monolayers on VE and E PDMS substrata. Images were acquired by time-lapse phase microscopy with frames taken every 3 minutes.

**Figure S2**

(A) Confocal projection of mosaic cadherin expression in CL-S1 cells. (B) Confocal single plane of HeLa and MDCK cells fixed and immunostained 4h post-plating.

## Sequence of VT constructs

GAATTCACCAATGATGATGGCCGCCAGGCAGCTCCACGATGAAGCTCGGAAATGGTCTAGCAAGGGC  
AATGACATCATTGCAGCAGCCAAGCGCATGGCTCTGCTGATGGCAGAGATGTCTCGGCTGGTAAGAGG  
GGCAGTGGTACCAAGCGGGCACTTATTCAGTGTGCCAAGGATATCGCCAAGGCCTCTGATGAGGTGA  
CGAGGTTGGCCAAGGAGGTTGCCAAGCAGTGCACAGATAAGCGGATTAGAACCAATCTCTTACAGGT  
ATGCGAGCGAATCCCAACTATAAGCACCCAGCTCAAATCCTATCCACAGTGAAGGCCACTATGCTGG  
GCCGACCAACATCAGTGATGAGGAGTCTGAGCAGGCCACAGAGATGCTGGTTCATAATGCCAGAA  
CCTCATGCAGTCTGTGAAGGAGACTGTGCGAGAGGCTGAAGCTGCTTCAATCAAATCCGAACAGATG  
CTGGCTTACTCTGCGCTGGGTCAGAAAGACTCCCTGGTACCAGGGATCC

## Sequence of pEGFP-C1 vector

Length: 523 bp, Vector size: 4733, Resistance: Kan, cloning site 5': EcoR I, cloning site 3': Bam HI, copy number: High

```
TAGTTATTAATAGTAATCAATTACGGGGTCATTAGTTCATAGCCCATATATGGAGTTCCGCGTTACATA
ACTTACGGTAAATGGCCCCGCTGGCTGACCGCCCAACGACCCCCGCCATTGACGTCAATAATGACGT
ATGTTCCCATAGTAACGCCAATAGGGACTTTCCATTGACGTCAATGGGTGGAGTATTACGGTAAACT
GCCCACTTGGCAGTACATCAAGTGTATCATATGCCAAGTACGCCCCCTATTGACGTCAATGACGGTAA
ATGGCCCCGCTGGCATTATGCCCAGTACATGACCTTATGGGACTTTCCTACTTGGCAGTACATCTACGT
ATTAGTCATCGCTATTACCATGGTGTATGCGGTTTTGGCAGTACATCAATGGGCGTGGATAGCGGTTTGA
CTCACGGGGATTTC AAGTCTCCACCCATTGACGTCAATGGGAGTTTGT TTTGGCACCAAATCAACG
GGACTTTC AAAATGTCGTAACAAC TCCGCCCCATTGACGCAAATGGGCGGTAGGCGTGTACGGTGGG
AGGTCTATATAAGCAGAGCTGGTTTAGTGAACCGTCAGATCCGCTAGCGCTACCGGACTCAGATCTCG
AGCTCAAGCTTCGAATTCTGCAGTCGACGGTACCGCGGGCCCGGGATCCACCGGTCCGCCACCATGGTG
AGCAAGGGCGAGGAGCTGTTACCGGGGTGGTGCCATCCTGGTCGAGCTGGACGGCGACGTAAACG
GCCACAAGTTCAGCGTGTCCGGCGAGGGCGAGGGCGATGCCACCTACGGCAAGCTGACCCTGAAGTT
CATCTGCACCACCGGCAAGCTGCCCGTGCCTGGCCCCACCTCGTGACCACCTGACCTACGGCGTGC
AGTGCTTCAGCCGCTACCCCGACCACATGAAGCAGCAGACTTCTTCAAGTCCGCCATGCCCGAAGGC
TACGTCCAGGAGCGCACCATCTTCTTCAAGGACGACGGCAACTACAAGACCCGCGCCGAGGTGAAGTT
CGAGGGCGACACCCTGGTGAACCGCATCGAGCTGAAGGGCATCGACTTCAAGGAGGACGGCAACATC
CTGGGGCACAAGCTGGAGTACAAC TACAACAGCCACAACGTCTATATCATGGCCGACAAGCAGAAGA
ACGGCATCAAGGTGAAC TCAAGATCCGCGACAACATCGAGGACGGCAGCGTGCAGCTCGCCGACCA
CTACCAGCAAGAACCCCCATCGGCGCAGCGCCCCGTGTCTGCCCGACAACCACCTACCTGAGCACCC
AGTCCGCCCTGAGCAAAGACCCCAACGAGAAGCGCGATCACATGGTCCTGCTGGAGTTCGTGACCGCC
GCCGGGATCACTCTCGGCATGGACGAGCTGTACAAGTAAAGCGGCCGCGACTCTAGATCATAATCAGC
CATAACCACATTTGTAGAGGTTTTACTTGCTTTAAAAAACCTCCACACCTCCCCCTGAACCTGAAACAT
AAAATGAATGCAATTGTTGTTGTTAACTTGTTTATTGCAGCTTATAATGGTTACAAATAAAGCAATAGC
ATCACAAATTTACAAATAAAGCATT TTTTTTACTGCATTCTAGTTGTGGTTTTGTCCAAACTCATCAAT
GTATCTTAAGGCGTAAATTGTAAGCGTTAATATTTTTGTTAAAATTCGCGTTAAAATTTTTGTTAAATCAG
CTCATTTTTTAACCAATAGGCCGAAATCGGCCAAAATCCCTTATAAATCAAAAAGAATAGACCGAGATAG
GGTTGAGTGTGTTCCAGTTTGAACAAGAGTCCACTATTAAGAACGTGGACTCCAACGTCAAAGGG
CGAAAAACCGTCTATCAGGGCGATGGCCCACTACGTGAACCATCACCTAATCAAGTTTTTTGGGGTC
GAGGTGCCGTAAAGCACTAAATCGGAACCTAAAGGGAGCCCCGATTTAGAGCTTGACGGGGAAAG
CCGCGCAACGTGGCGAGAAAGGAAGGGAAGAAAGCGAAAGGAGCGGGCGCTAGGGCGCTGGCAAGT
GTAGCGGTACGCTGCGCGTAACCACCACACCCGCCGCGCTTAATGCGCCGCTACAGGGCGCGTCAGG
TGGCACTTTTCGGGGAAATGTGCGCGGAACCCCTATTTGTTATTTTTCTAAATACATTCAAATATGTA
TCCGCTCATGAGACAATAACCCTGATAAATGCTTCAATAATATTGAAAAAGGAAGAGTCTGAGGCGG
AAAGAACCAGCTGTGGAATGTGTGTACAGTTAGGGTGTGGAAAGTCCCCAGGCTCCCCAGCAGGCAGA
AGTATGCAAAGCATGCATCTCAATTAGTCAGCAACCAGGTGTGGAAAGTCCCCAGGCTCCCCAGCAGG
CAGAAGTATGCAAAGCATGCATCTCAATTAGTCAGCAACCATAGTCCC GCCCTAACTCCGCCCATCC
CGCCCCTAACTCCGCCAGTTCGCCCATTTCTCCGCCCATGGCTGACTAATTTTTTTTATTTATGCAGA
GGCCGAGGCCGCCTCGGCCTCTGAGCTATTCCAGAAGTAGTGAGGAGGCTTTTTTGGAGGCCTAGGCT
TTTGCAAAGATCGATCAAGAGACAGGATGAGGATCGTTTCGCATGATTGAACAAGATGGATTGCACGC
AGGTTCTCCGGCCGCTTGGGTGGAGAGGCTATTCGGCTATGACTGGGCACAACAGACAATCGGCTGCT
CTGATGCCGCCGTGTTCCGGCTGTCAGCGCAGGGCGGCCCGTTCTTTTTGTCAAAGACCCGACTGTCCG
GTGCCCTGAATGAACTGCAAGACGAGGCAGGCAGCGCGCTATCGTGGCTGGCCACGACGGCGCTTCTTGC
GCAGCTGTGCTCGACGTTGCTACTGAAGCGGGAAGGGACTGGCTGCTATTGGGCGAAGTGCCGGGGC
AGGATCTCCTGTCATCTCACCTTGCTCCTGCCGAGAAAGTATCCATCATGGCTGATGCAATGCGGGCGC
TGCATACGCTTGATCCGGCTACCTGCCCATTCGACCACCAAGCGAAACATCGCATCGAGCGAGCACGT
ACTCGGATGGAAGCCGGTCTTGTCGATCAGGATGATCTGGACGAAGAGCATCAGGGGCTCGCGCCAG
CCGAACTGTTCCGCCAGGCTCAAGGCGAGCATGCCCGACGGCGAGGATCTCGTCGTGACCCATGGCGAT
GCCTGCTTGCCGAATATCATGGTGGAAAATGGCCGCTTTTCTGGATTTCATCGACTGTGGCCGGCTGGGT
GTGGCGGACCGCTATCAGGACATAGCGTTGGCTACCCGTGATATTGCTGAAGAGCTTGGCGGCGAATG
GGCTGACCGCTTCTCGTGCTTTACGGTATCGCCGCTCCCGATTTCGAGCGCATCGCCTTCTATCGCCT
TCTTGACGAGTTCTTCTGAGCGGGACTCTGGGGTTCGAAATGACCGACCAAGCGACGCCCAACCTGCC
```

ATCACGAGATTTTCGATTCCACCGCCGCCTTCTATGAAAGGTTGGGCTTCGGAATCGTTTTCCGGGACGC  
CGGCTGGATGATCCTCCAGCGCGGGGATCTCATGCTGGAGTTCCTTCGCCACCCTAGGGGGAGGCTAA  
CTGAAACACGGAAGGAGACAATACCGGAAGGAACCCGCGCTATGACGGCAATAAAAAGACAGAATA  
AAACGCACGGTGTGGGTTCGTTTTGTTTCATAAACGCGGGGTTCCGGTCCCAGGGCTGGCACTCTGTCGAT  
ACCCACCGAGACCCCATGGGGCCAATACGCCCGGTTTCTCCTTTTCCCCACCCACCCCAAGT  
TCGGGTGAAGGCCAGGGCTCGCAGCCAACGTCGGGGCGGCAGGCCCTGCCATAGCCTCAGGTTACTC  
ATATATACTTTAGATTGATTTAAAACCTTCATTTTTAATTTAAAAGGATCTAGGTGAAGATCCTTTTTGAT  
AATCTCATGACCAAAATCCCTTAACGTGAGTTTTTCGTTCCACTGAGCGTCAGACCCCGTAGAAAAGAT  
CAAAGGATCTTCTTGAGATCCTTTTTTTCTGCGCGTAATCTGCTGCTTGCAAACAAAAAAACCACCGCT  
ACCAGCGGTGGTTTTGTTTGCCGGATCAAGAGCTACCAACTCTTTTTCCGAAGGTAACGGCTTCAGCAG  
AGCGCAGATACCAAATACTGTCTTCTAGTGTAGCCGTAGTTAGGCCACCACTTCAAGAACTCTGTAG  
CACCGCCTACATACCTCGCTCTGCTAATCCTGTTACCAGTGGCTGCTGCCAGTGGCGATAAGTCGTGTC  
TTACCGGGTTGGACTCAAGACGATAGTTACCGGATAAGGCGCAGCGGTCCGGCTGAACGGGGGGTTC  
GTGCACACAGCCAGCTTGGAGCGAACGACCTACACCGAACTGAGATACCTACAGCGTGAGCTATGA  
GAAAGCGCCACGCTTCCCGAAGGGAGAAAGGCGGACAGGTATCCGGTAAGCGGCAGGGTCGGAACA  
GGAGAGCGCACGAGGGAGCTTCCAGGGGGAAACGCCTGGTATCTTTATAGTCCTGTCCGGTTTTCGCCA  
CCTCTGACTTGAGCGTCGATTTTTGTGATGCTCGTCAGGGGGGCGGAGCCTATGGAAAAACGCCAGCA  
ACGCGGCCTTTTTACGGTTCCTGGCCTTTTGCTGGCCTTTTGCTCACATGTTCTTTCCTGCGTTATCCCT  
GATTCTGTGGATAACCGTATTACCGCCATGCAT

Figure S1

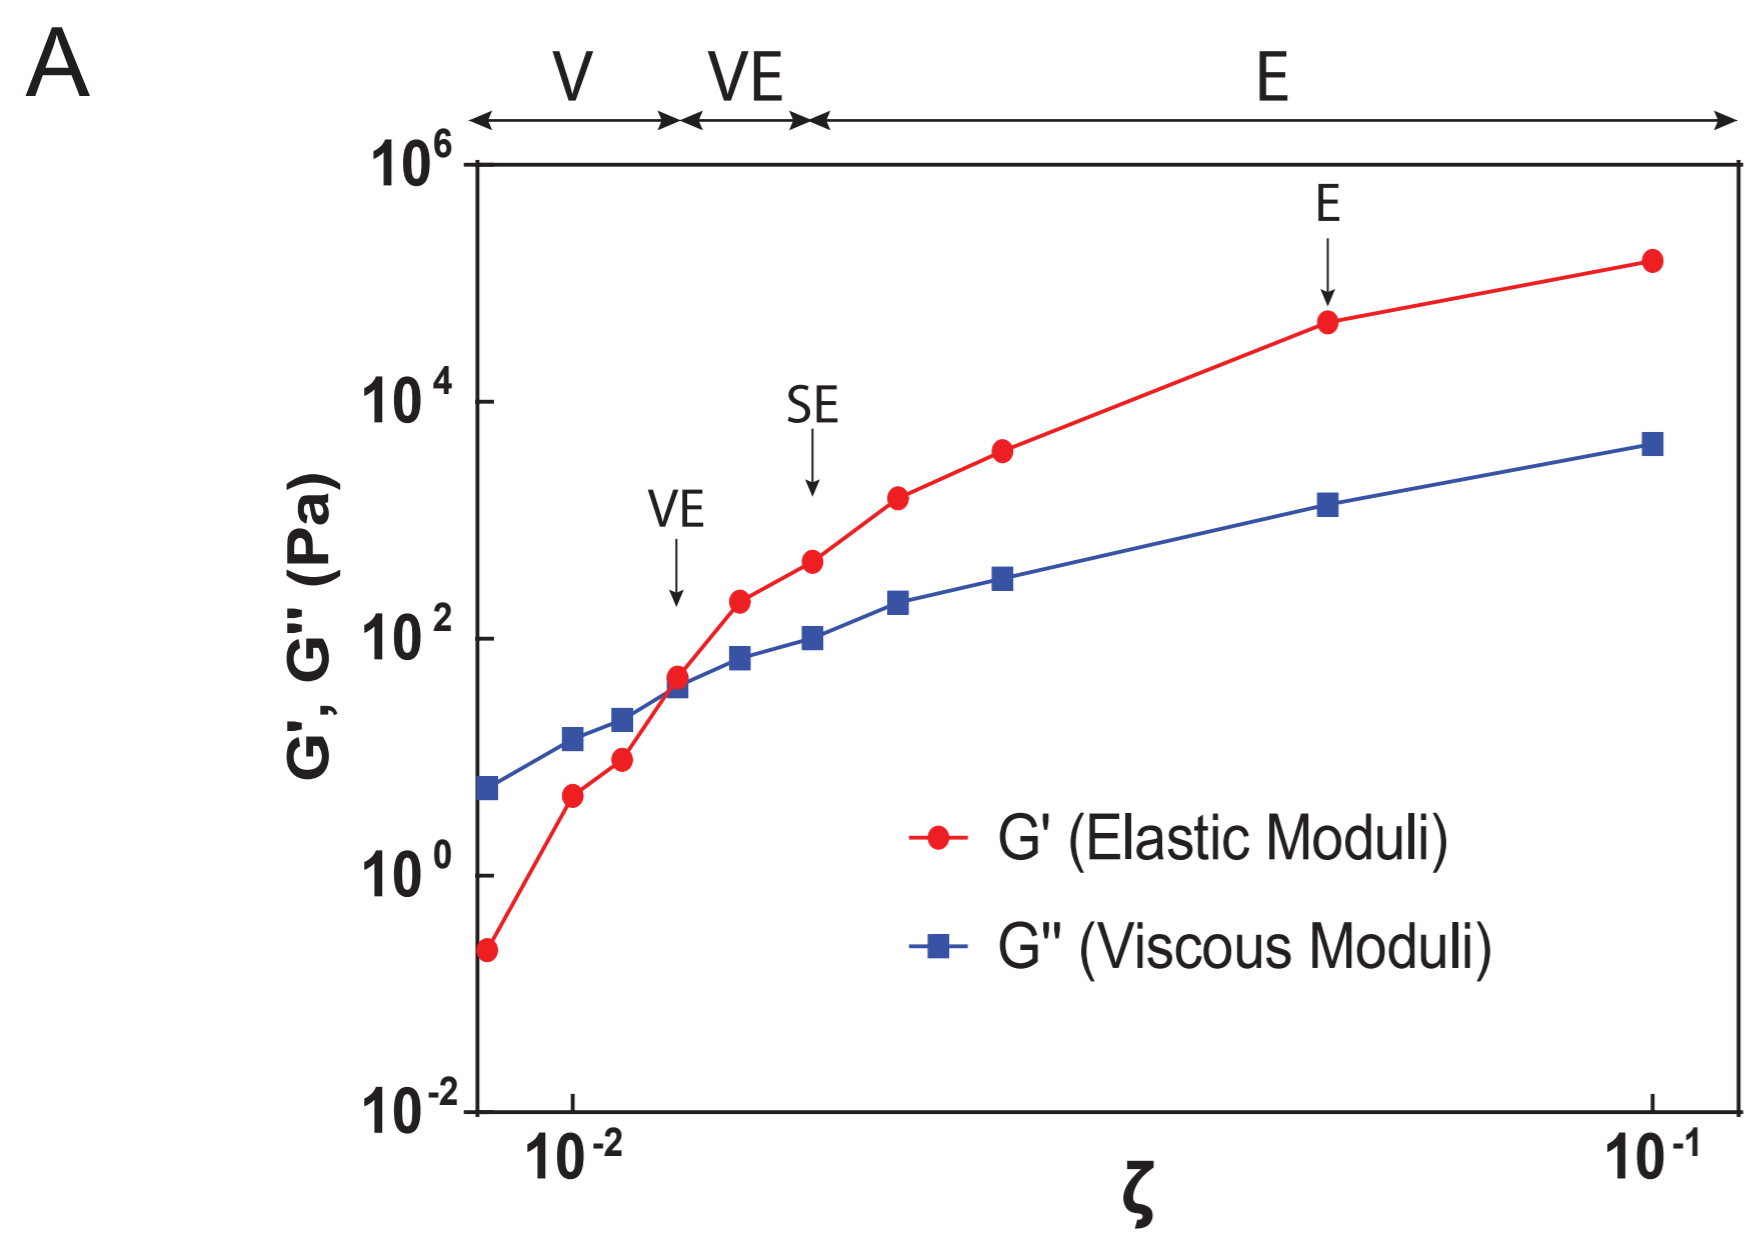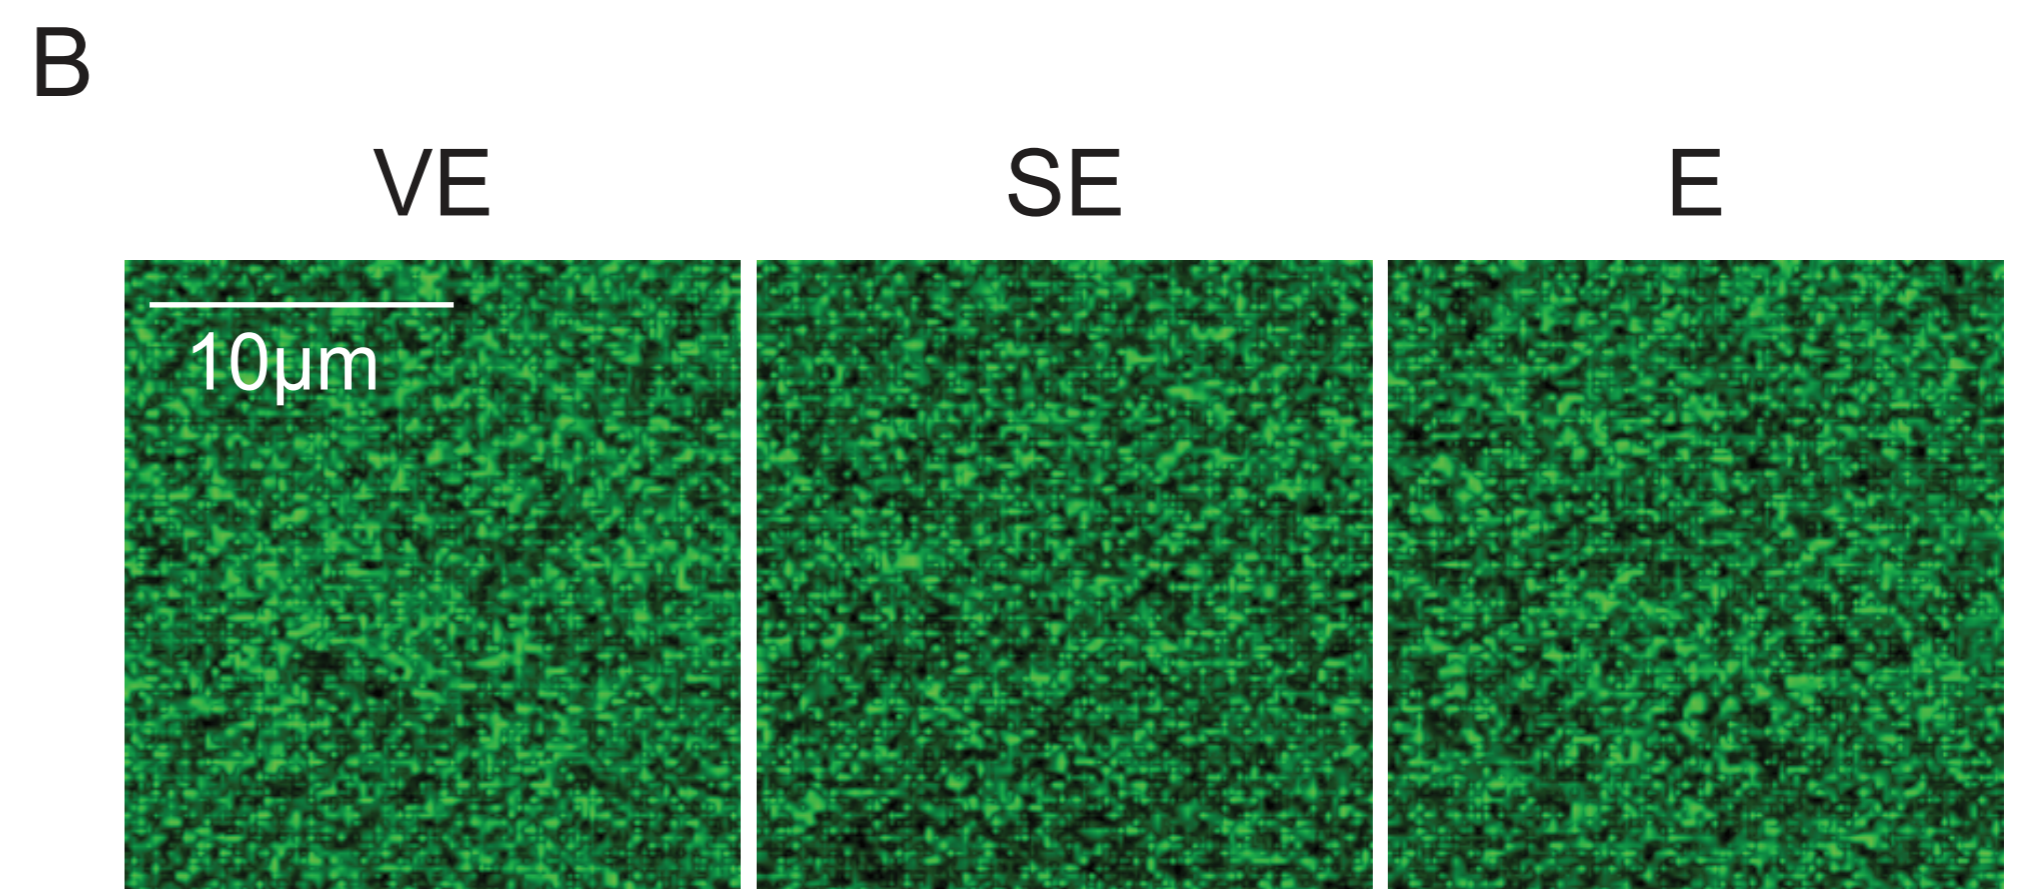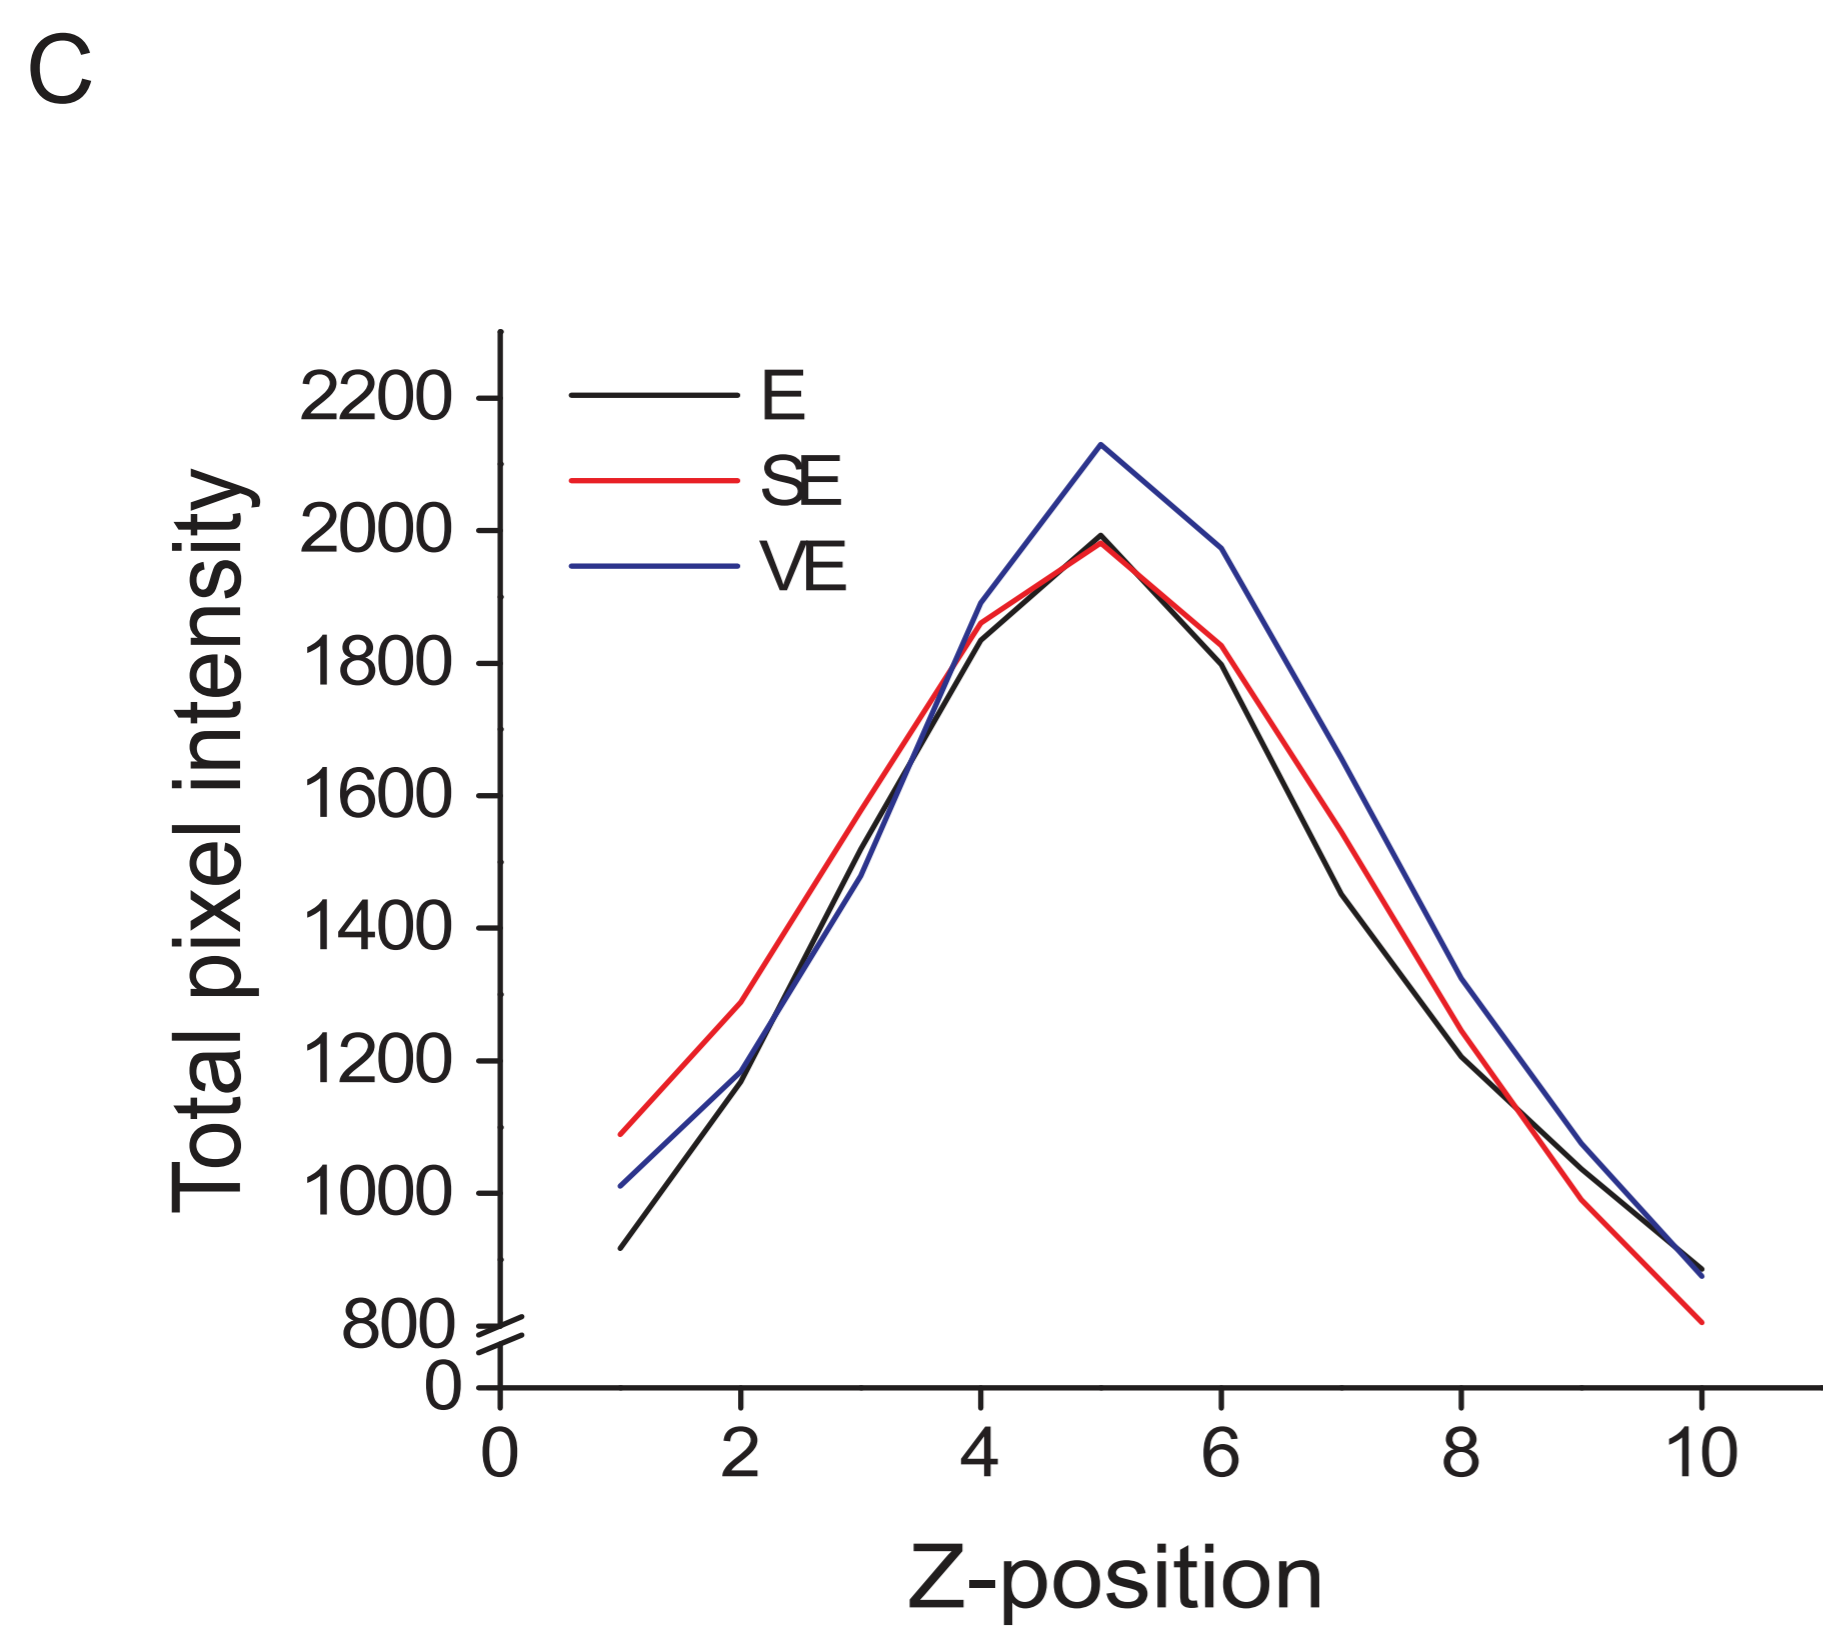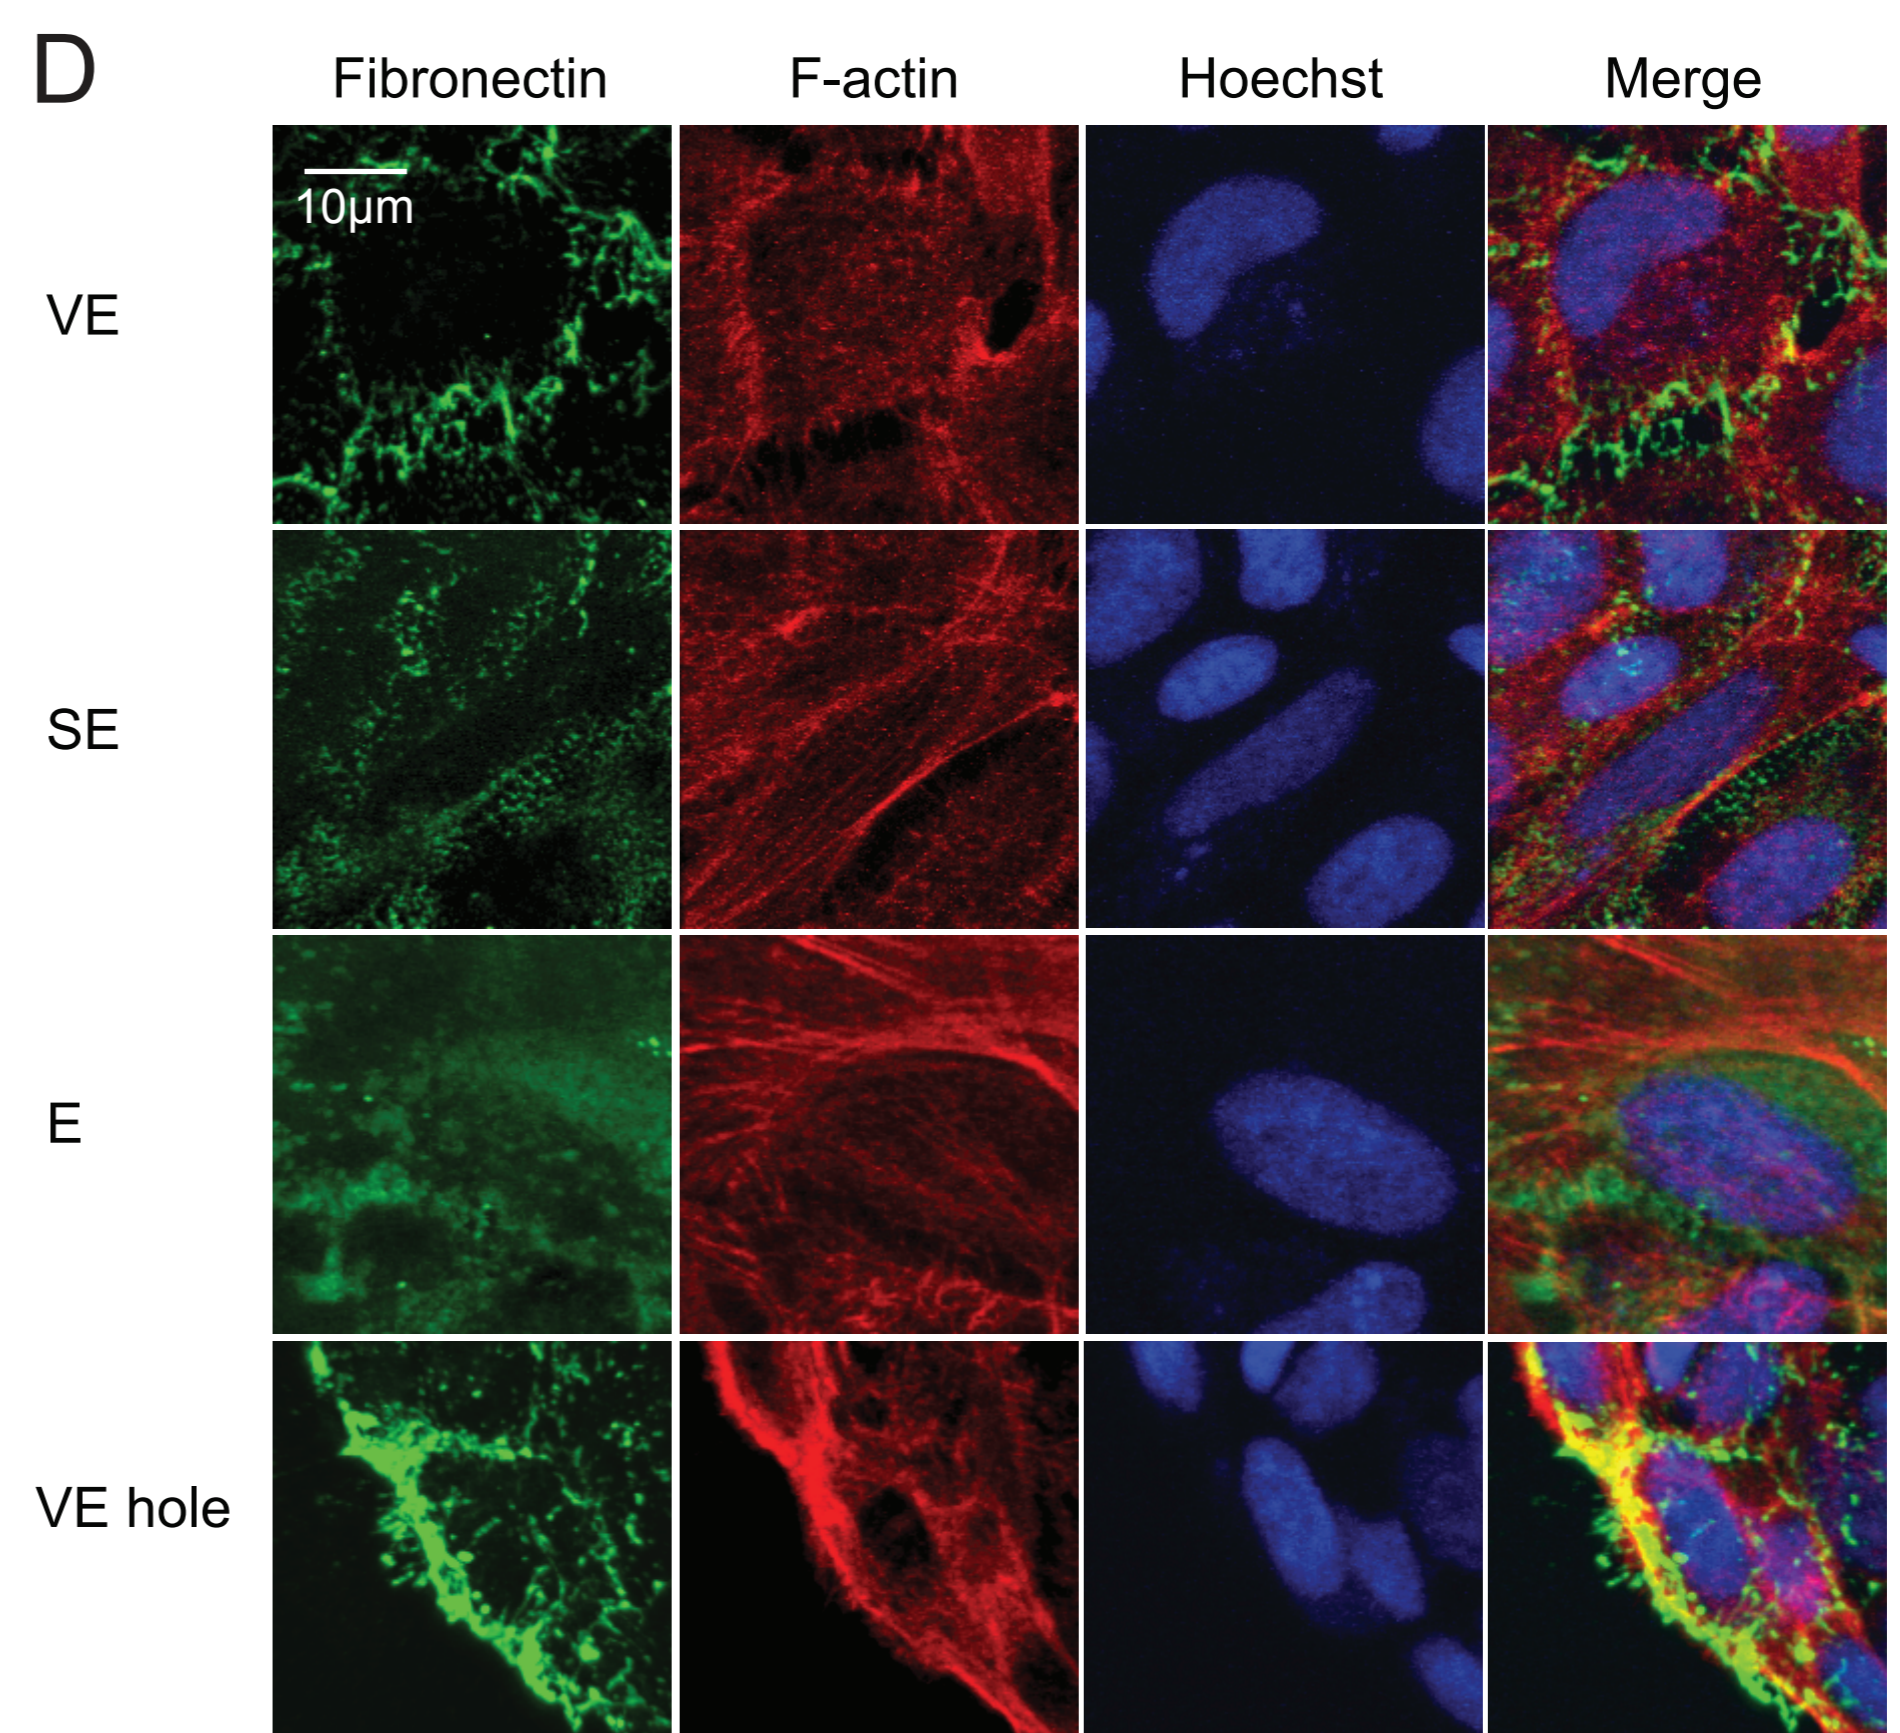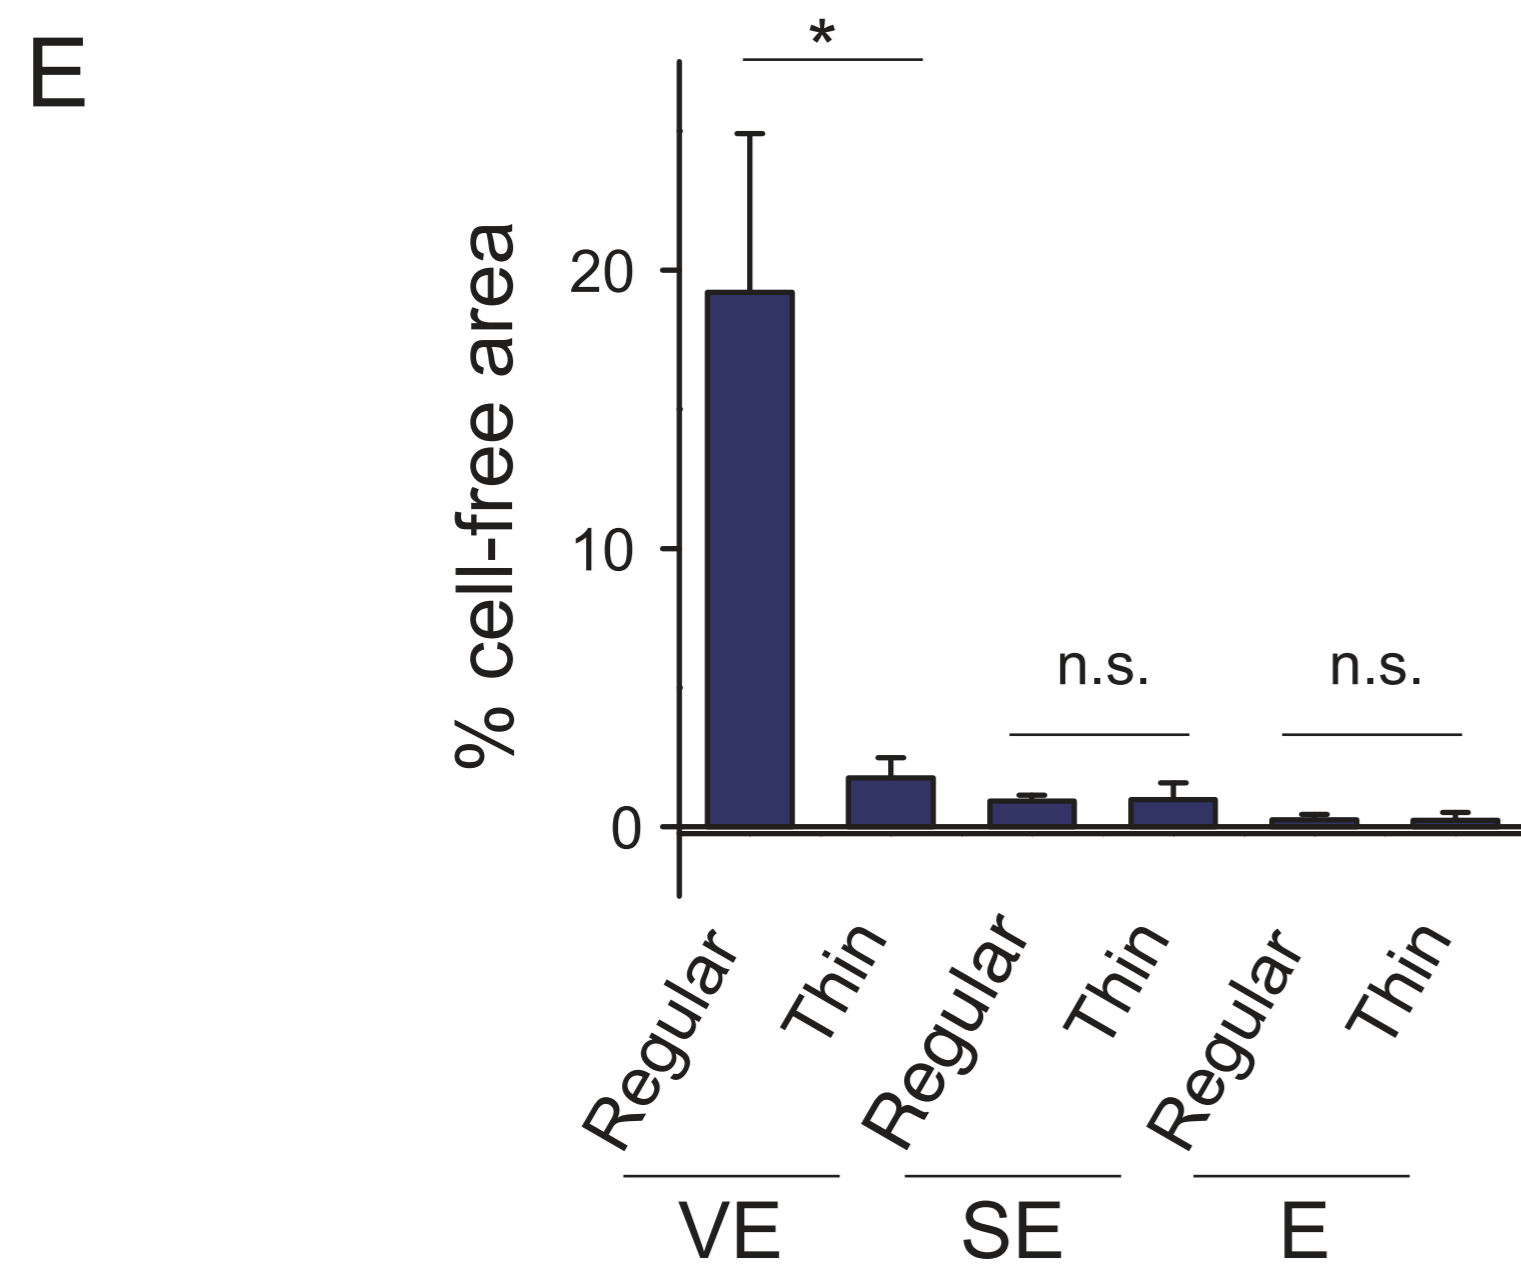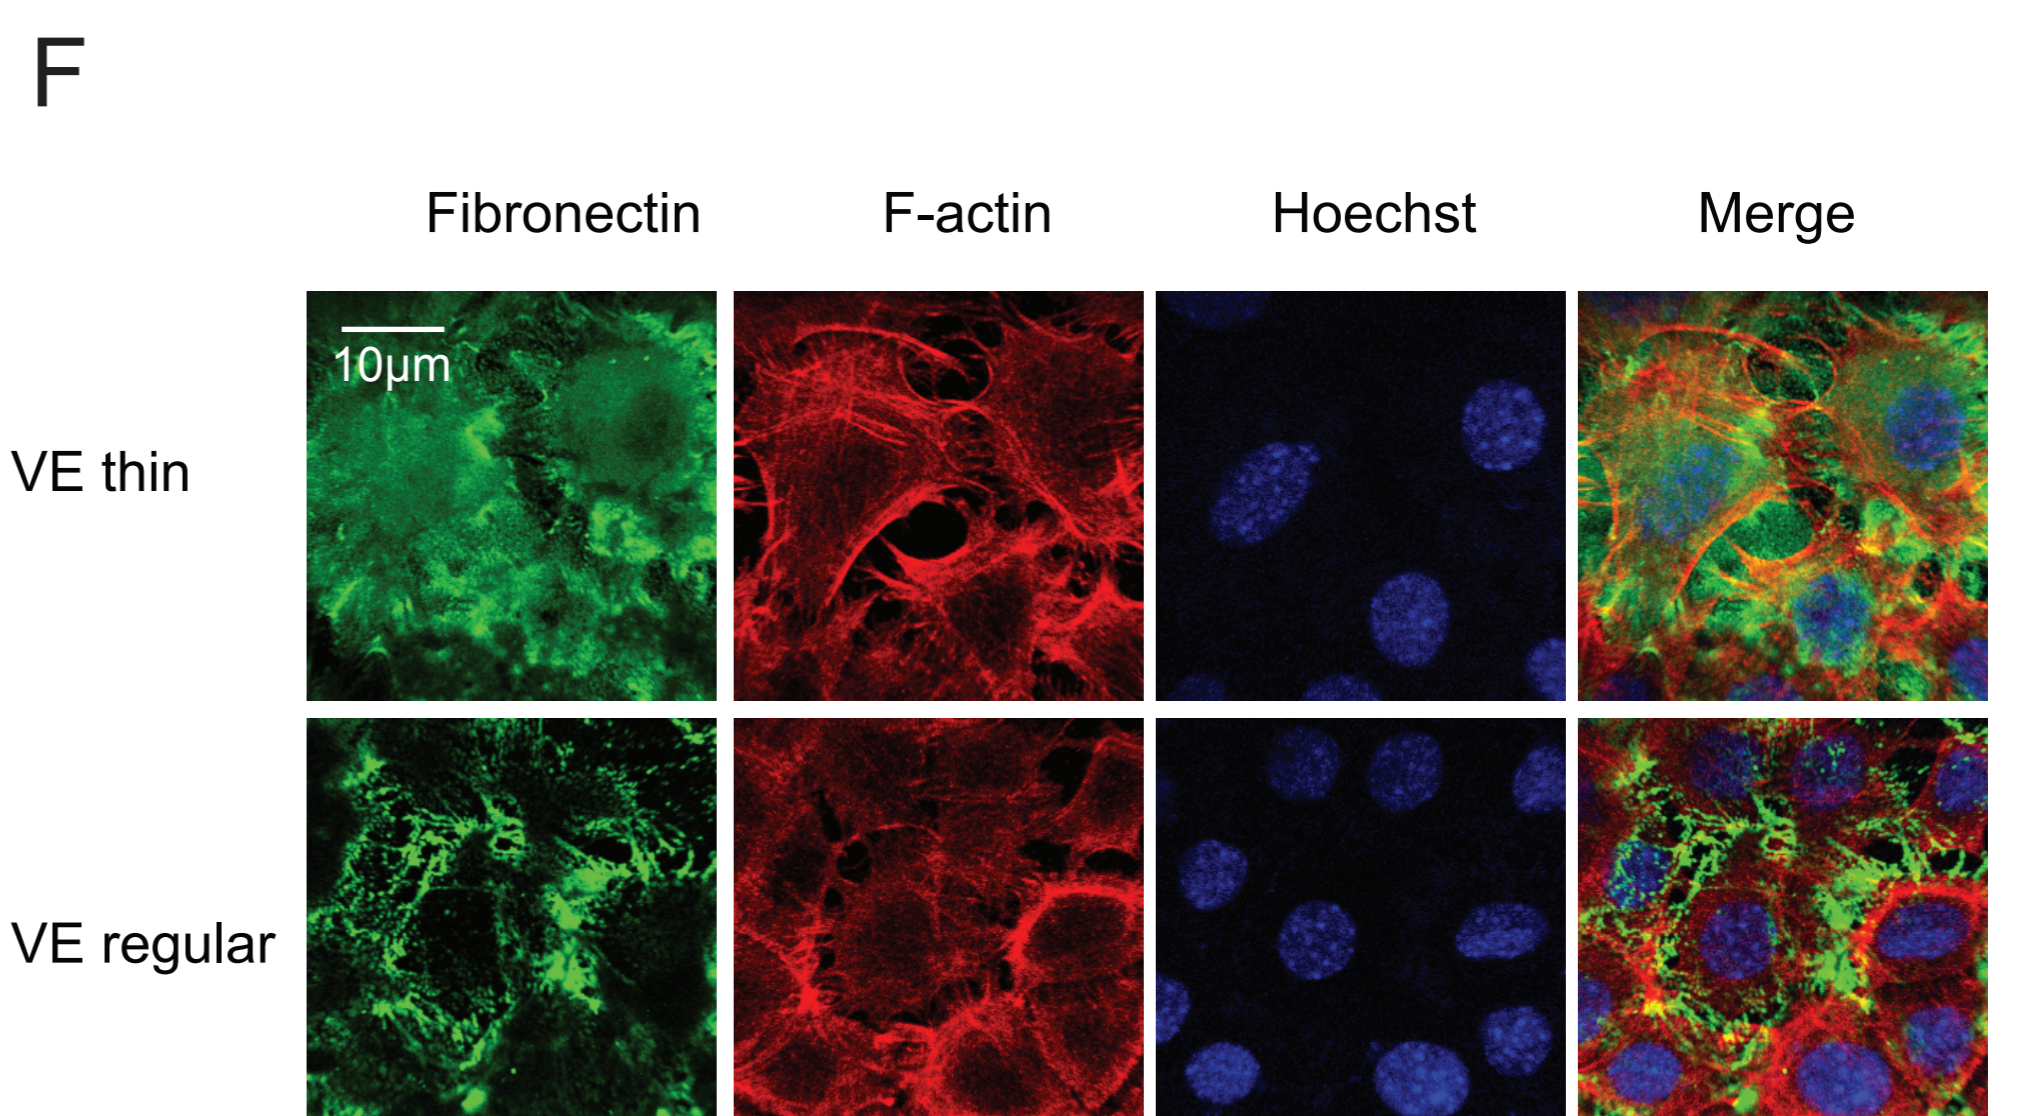

Figure S2

A

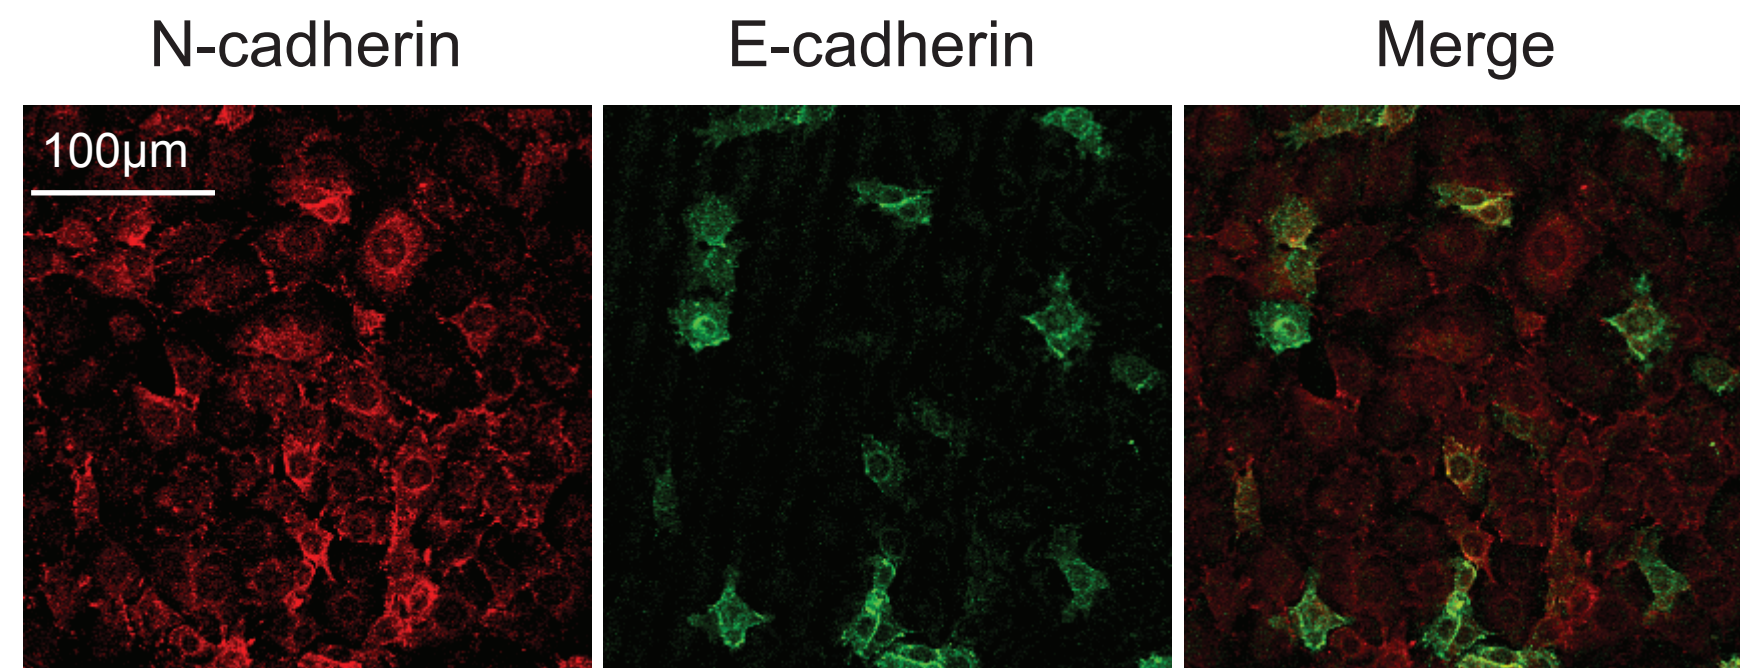

B

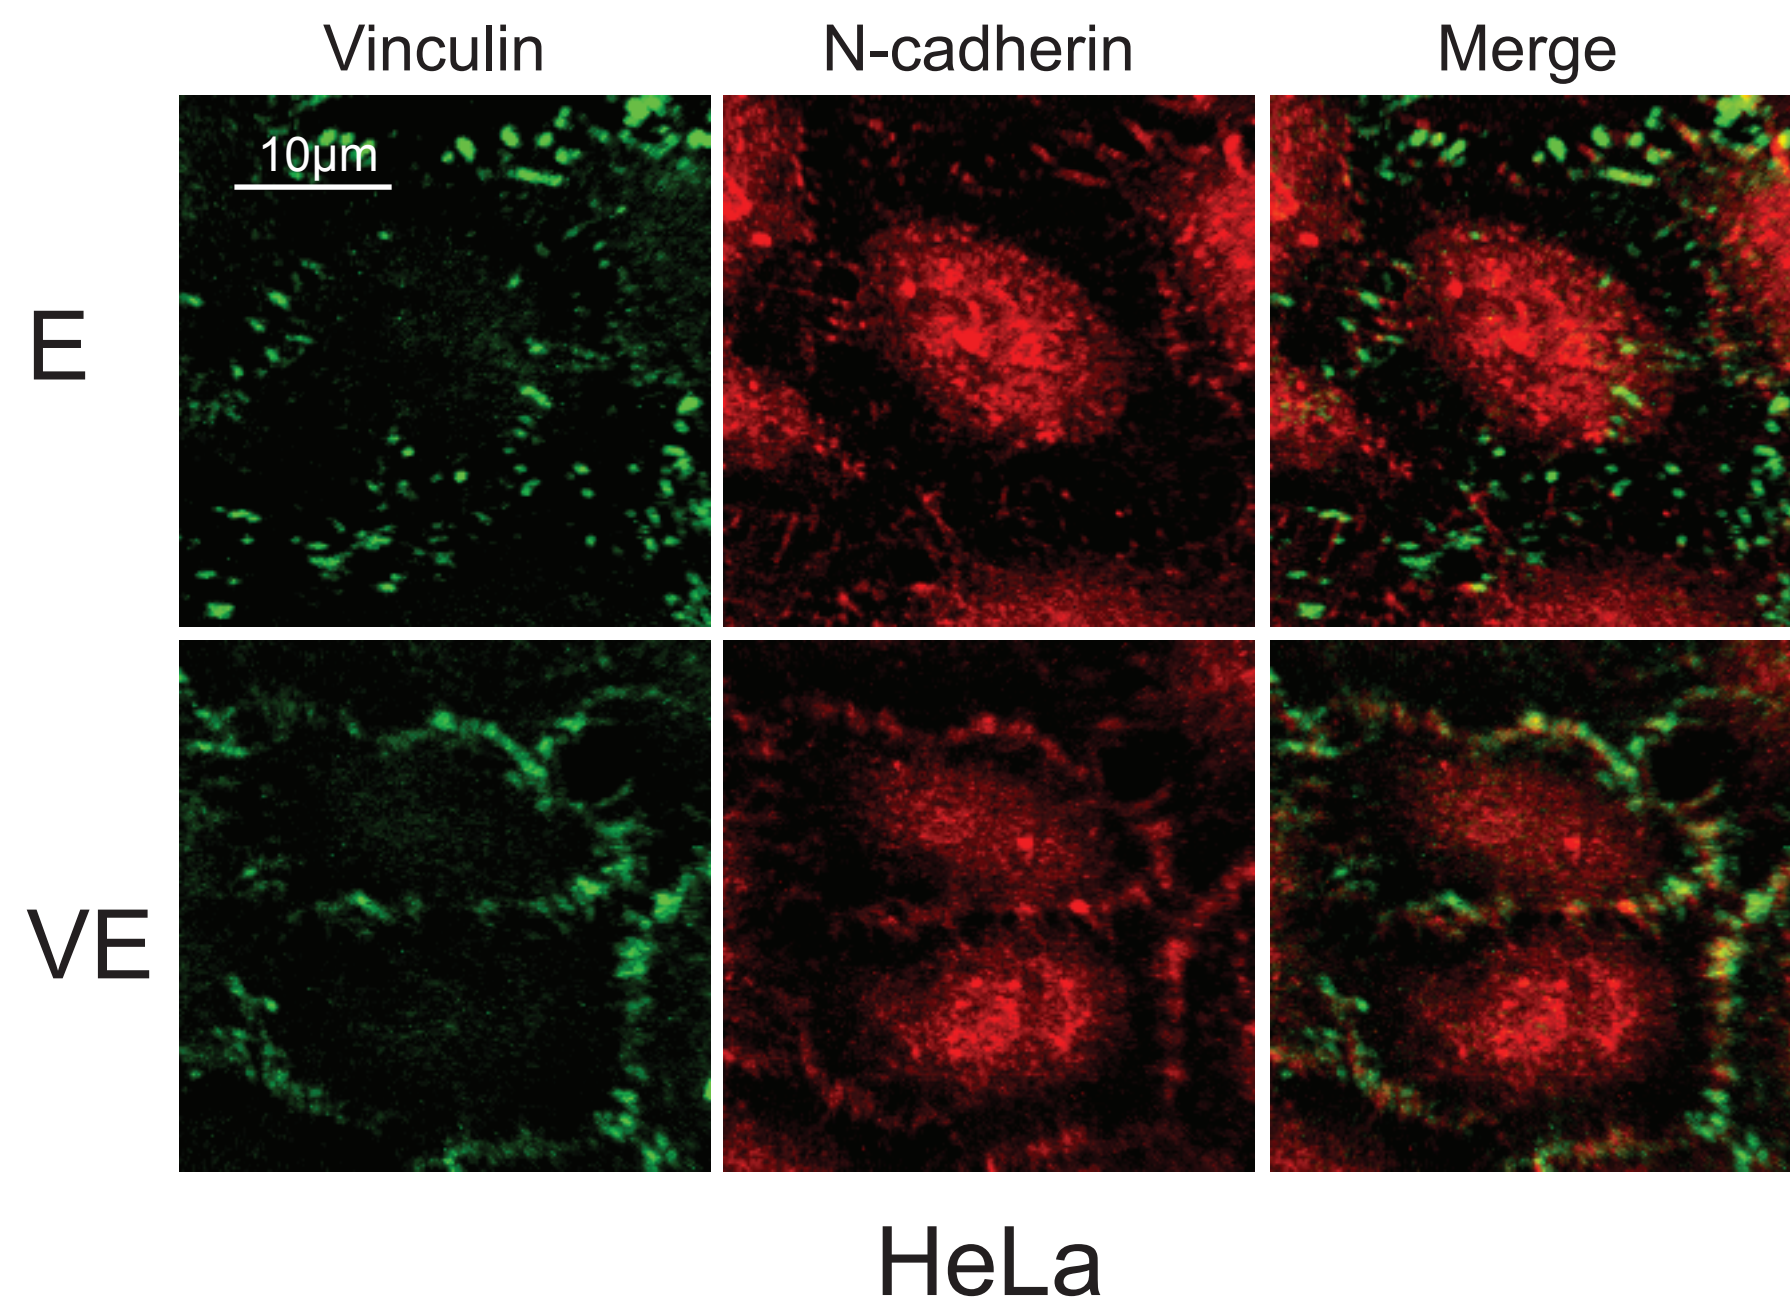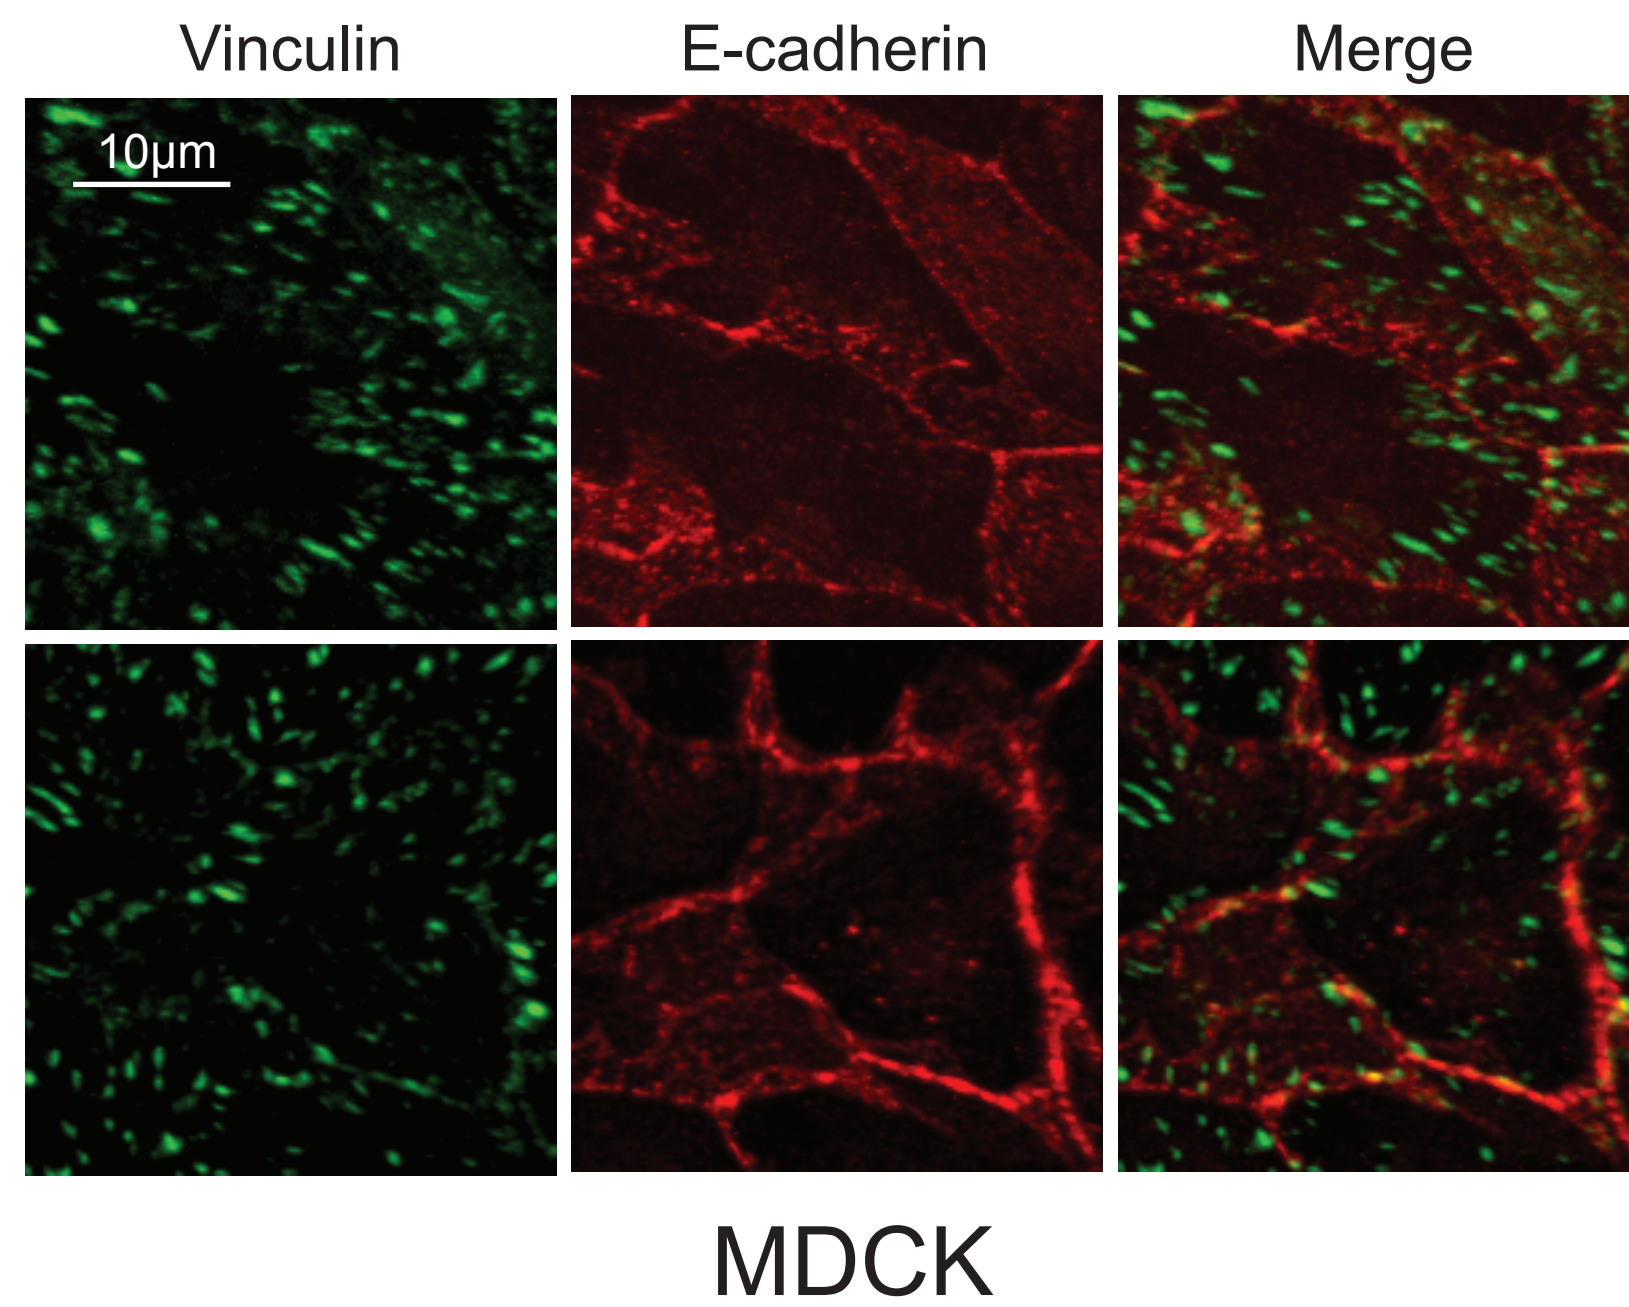

Supplement: mmc1.pdf [file mmc1.pdf]
